# Supplementary material for: Ivabradine Versus Beta-Blockers in Patients with Conduction Abnormalities or Left Ventricular Dysfunction Undergoing Cardiac Surgery
Source: Springer Nature journal article supplement (doi:10.1007/s40119-013-0024-1), 2013-12-16
Supplement: MOESM1 [file 9339366]

- In patients with conduction abnormalities or left ventricle (LV) dysfunction the use of  $\beta$ -blockers for post cardiac surgery rhythm control is difficult and controversial, with a paucity of information about other drugs such as ivabradine used postoperatively.
- This was an open-label, randomized clinical trial enrolling 527 patients with conduction abnormalities or LV systolic dysfunction undergoing coronary artery bypass grafting or valvular replacement, randomized to take ivabradine or metoprolol, or metoprolol plus ivabradine.
- Heart rate reduction and prevention of postoperative atrial fibrillation or tachyarrhythmia with combined therapy was more effective than with metoprolol or ivabradine alone during the immediate postoperative management of cardiac surgery patients.
- Considering efficacy and safety, the cardiac rhythm reduction after open heart surgery in patients with conduction abnormalities or LV dysfunction with ivabradine plus metoprolol emerged as the best treatment in this trial.

This summary slide represents the opinions of the authors. No funding or sponsorship was received for this study or publication of this article. For a full list of acknowledgments and conflicts of interest for all authors of this article, please see the full text online. Copyright © The Authors 2013. Creative Commons Attribution Noncommercial License (CC BY-NC).
